# Supplementary material for: PNPLA1 is a transacylase essential for the generation of the skin barrier lipid ω-O-acylceramide
Source: PubMed Central journal article supplement (PMC5337975; doi:10.1038/ncomms14610), 2017-03-01
Supplement: ncomms14610-s1.pdf [file ncomms14610-s1.pdf]

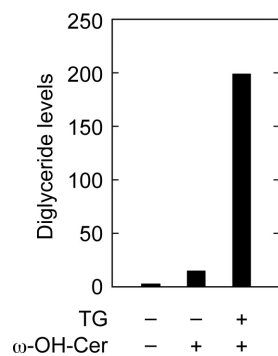

**Supplementary Figure 1 | Diglyceride is increased by a PNPLA1-dependent transacylation reaction.** Proteoliposomes containing PNPLA1 were incubated for 1 h at 37 °C in the presence or absence of TG and C30:0 ω-hydroxyceramide (ω-OH-Cer), as indicated. Lipids were extracted, and the diglyceride containing linoleic acid was quantified by LC-MS/MS analysis in MRM mode selecting the *m/z* 634.5 at Q1 and the *m/z* 337.3 at Q3. Values represent the amount of diglyceride relative to the control (without TG or C30:0 ω-hydroxyceramide).

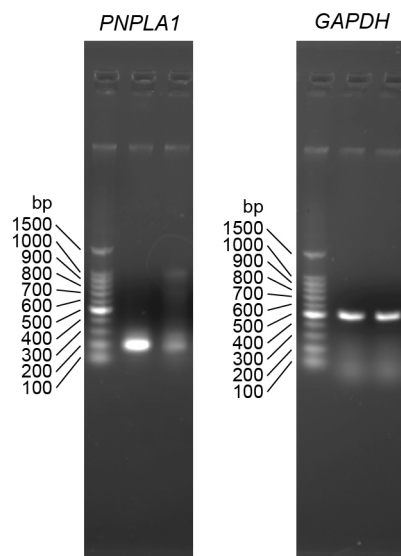

**Supplementary Figure 2 | Uncropped scanned photographs.** Uncropped scanned photographs of the electrocataphoresis gels in Fig. 2a are presented.

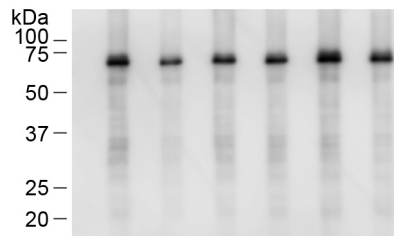

**Supplementary Figure 3 | An uncropped scan of the blot.** An uncropped scan of the blot in Fig. 5a is presented.

**Supplementary Table 1** | Primers used in this study

| <b>Primer</b>  | <b>Sequence</b>                                                  |
|----------------|------------------------------------------------------------------|
| ABHD5-F        | 5'-GGATCCATGGCGGCGGAGGAGGAGGAGGTGG-3'                            |
| ABHD5-R        | 5'-TCAGTCCACAGTGTCTCGCAGATCTCC-3'                                |
| LIPN-F         | 5'-AGATCTATGATGTGGCTGCTTTTAACAACAAC-3'                           |
| LIPN-R         | 5'-TTAGGAATATGCCTTCATTAAGC-3'                                    |
| PNPLA1-F       | 5'-AGATCTATGGAAGAACAGGTGTTCAAGGGGG-3'                            |
| PNPLA1-R       | 5'-TCACTGCACTTTGCTGCTTGGTTTTTTGG-3'                              |
| PLA2G15-F      | 5'-AGATCTATGGGCCTCCACCTCCGCCCTACC-3'                             |
| PLA2G15-R      | 5'-TCAGGGCCCAAGGAGCACACGTTTC-3'                                  |
| LCAT-F         | 5'-AGATCTATGGGGCCCGCCGGCTCCCATGGC-3'                             |
| LCAT-R         | 5'-TTATTCAGGAGGCGGGGGCTCTGGG-3'                                  |
| DGAT2-F        | 5'-AGATCTATGAAGACCTCATAGCCGCCTACTC-3'                            |
| DGAT2-R        | 5'-TCAGTTCACCTCCAGGACCTCAGTC-3'                                  |
| shPNPLA1-F     | 5'-ACCTCGGGTGAATAAGGTCTTCAATTCAAGAGATTGAAG<br>ACCTTATTCACCTT-3'  |
| shPNPLA1-R     | 5'-CAAAAAGGGTGAATAAGGTCTTCAATTCAAGAGATTGA<br>AGACCTTATTCACCCG-3' |
| PNPLA1-F2      | 5'-AACTAGGCCAAGAACAGCCC-3'                                       |
| PNPLA1-R2      | 5'-CCGAATGTCTTGGGAAGCCT-3'                                       |
| GAPDH-F        | 5'-CTGTTCGACAGTCAGCCGCATCTTC-3'                                  |
| GAPDH-R        | 5'-CCGTTGACTCCGACCTTCACCTTCC-3'                                  |
| PNPLA1 A34T-F  | 5'-CAGGTGCTGTGATCGTCCGCTGGCCATCTG-3'                             |
| PNPLA1 A34T-R  | 5'-CAGATGGCCAGGGCGACGATCACAGCACCTG-3'                            |
| PNPLA1 A59V-F  | 5'-GCGGGGGCTGTGGACACCCTGCGGGACCTGG-3'                            |
| PNPLA1 A59V-R  | 5'-CCAGGTCCCGCAGGGTGTCCACAGCCCCCGC-3'                            |
| PNPLA1 E131X-F | 5'-CGCTTAACGGACGGGTAGAATGTGGTGGTTTC-3'                           |
| PNPLA1 E131X-R | 5'-GAAACCACCACATTCTACCCGTCCGTTAAGCG-3'                           |

**Supplementary Table 2** | Selected *m/z* values and collision energies for acylceramide species in MS/MS analysis

| <b>Acylceramide species</b> | <b>Precursor ion (Q1)</b> | <b>Product ion (Q3)</b> | <b>Collision energy (V)</b> |
|-----------------------------|---------------------------|-------------------------|-----------------------------|
| d18:1/C26:1/C18:2           | 936.8, 954.8              | 264.2                   | 35                          |
| d18:1/C26:0/C18:2           | 938.8, 956.8              | 264.2                   | 35                          |
| d18:1/C28:1/C18:2           | 964.8, 982.8              | 264.2                   | 35                          |
| d18:1/C28:0/C18:2           | 966.8, 984.8              | 264.2                   | 35                          |
| d18:1/C30:1/C18:2           | 992.8, 1010.8             | 264.2                   | 40                          |
| d18:1/C30:0/C18:2           | 994.8, 1012.8             | 264.2                   | 40                          |
| d18:1/C32:1/C18:2           | 1020.8, 1038.8            | 264.2                   | 40                          |
| d18:1/C32:0/C18:2           | 1022.8, 1040.8            | 264.2                   | 40                          |
| d18:1/C34:1/C18:2           | 1048.8, 1066.8            | 264.2                   | 40                          |
| d18:1/C34:0/C18:2           | 1050.8, 1068.8            | 264.2                   | 40                          |
| d18:1/C36:1/C18:2           | 1076.8, 1094.8            | 264.2                   | 45                          |
| d18:1/C36:0/C18:2           | 1078.8, 1096.8            | 264.2                   | 45                          |

**Supplementary Table 3** | Selected *m/z* values for TG species in MS/MS analysis

| <b>TG species</b> | <b>Precursor ion (Q1)</b> | <b>Product ion (Q3)</b> |
|-------------------|---------------------------|-------------------------|
| C18:2/C30:1       | 818.8                     | 521.5                   |
| C18:2/C30:0       | 820.8                     | 523.5                   |
| C18:2/C32:1       | 846.8                     | 549.5                   |
| C18:2/C32:0       | 848.8                     | 551.5                   |
| C18:2/C34:2       | 872.8                     | 575.5                   |
| C18:2/C34:1       | 874.8                     | 577.5                   |
| C18:2/C34:0       | 876.8                     | 579.5                   |
| C18:2/C36:3       | 898.8                     | 601.5                   |
| C18:2/C36:2       | 900.8                     | 603.5                   |
| C18:2/C36:1       | 902.8                     | 605.5                   |
| C18:2/C36:0       | 904.8                     | 607.5                   |
